# Supplementary material for: The natural compound neobractatin inhibits cell proliferation mainly by regulating the RNA binding protein CELF6
Source: Royal Society of Chemistry journal article supplement (doi:10.1039/d1fo03542h), 2022-01-01

Un-cropped images from Figure 3B

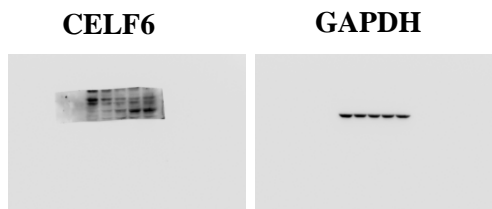

Un-cropped images from Figure 3C

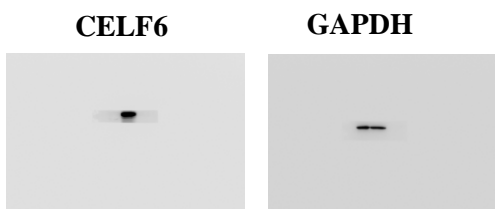

Un-cropped images from Figure 5A

cyclinD1

GAPDH

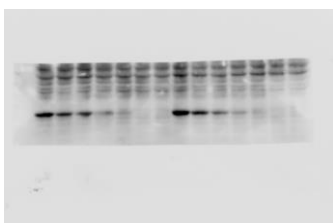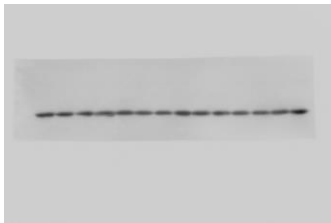

Un-cropped images from Figure 5B

cyclinD1

GAPDH

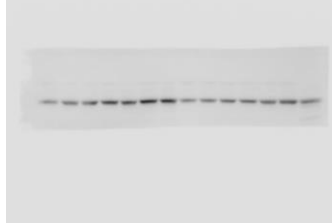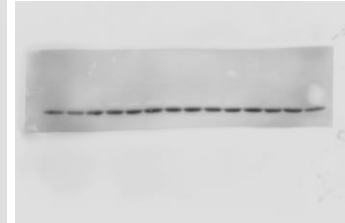

Un-cropped images from Figure 5C

cyclinD1

$\alpha$ -tubulin

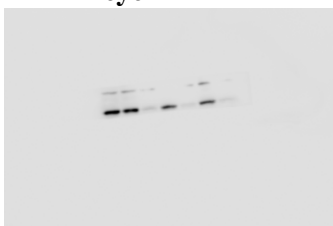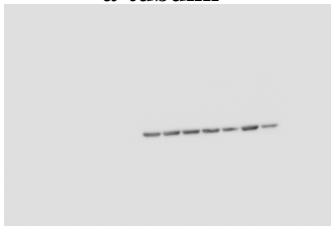

Un-cropped images from Figure 5D

cyclinD1

GAPDH

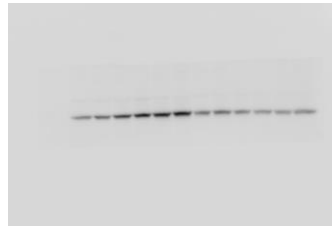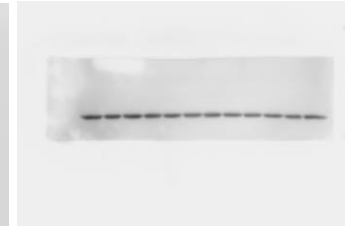

Un-cropped images from Figure 5E

cyclinD1 control

GAPDH

cyclinD1 cell6

GAPDH

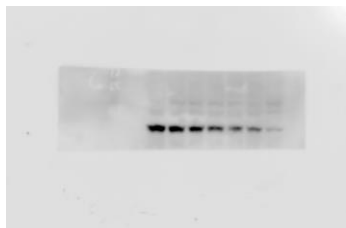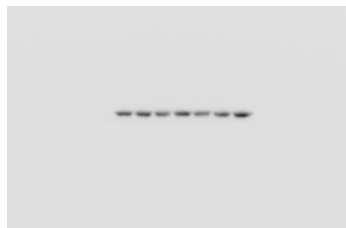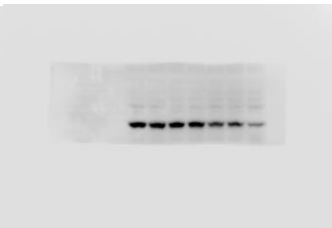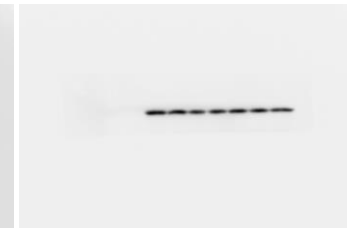

Un-cropped images from Figure S4A

P21

GAPDH

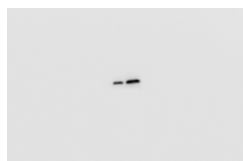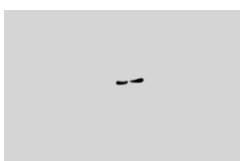

cyclinD1

GAPDH

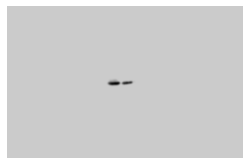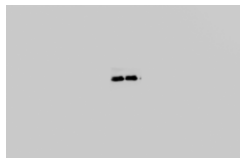

**Un-cropped images from Figure 6B**

**pRb**

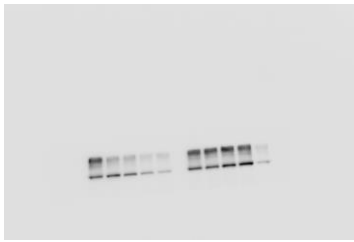

**E2F1**

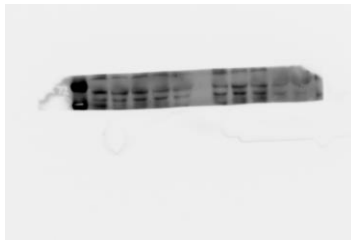

**cyclinE1**

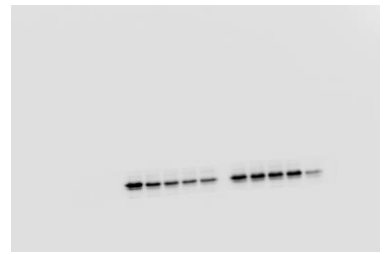

**cyclinD3**

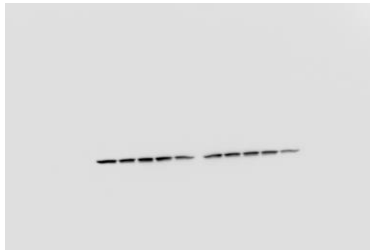

**CDK2**

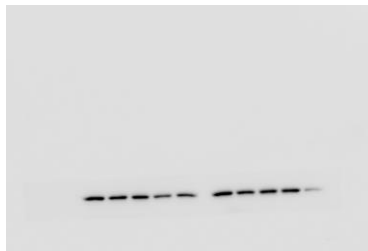

**CDK4**

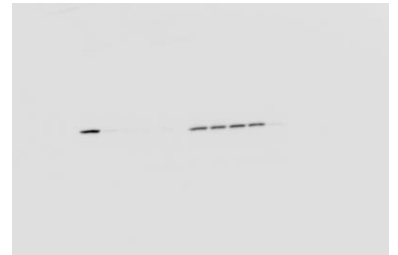

**CDK6**

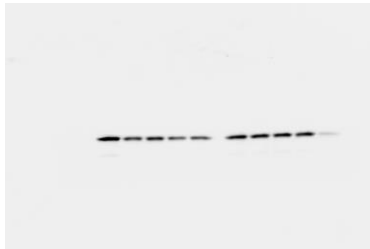

**GAPDH**

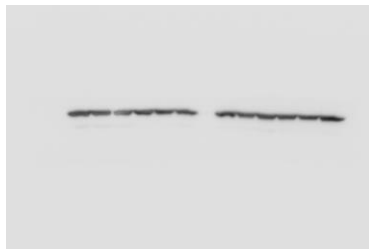

**P21**

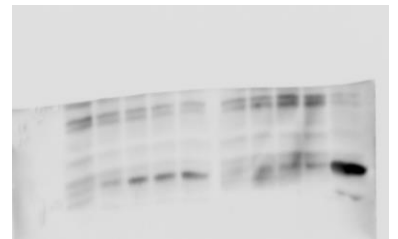

**Un-cropped images from Figure 6D**

**CELF6**

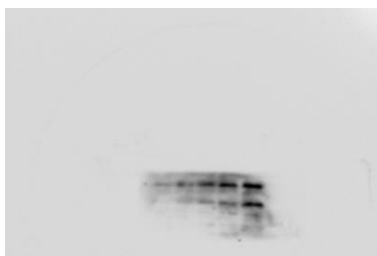

**$\beta$ -actin**

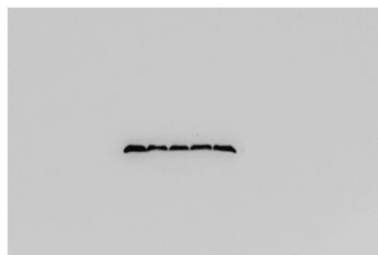

**CELF6**

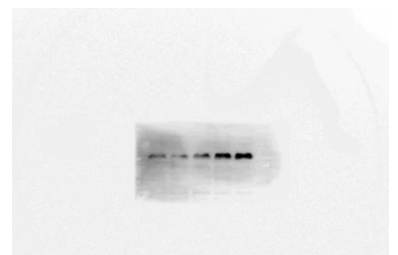

**$\beta$ -actin**

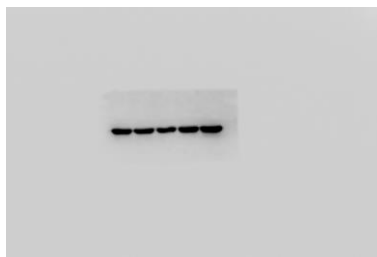

Supplement: d1fo03542h2.pdf [file d1fo03542h2.pdf]
