# Supplementary material for: The natural compound neobractatin inhibits cell proliferation mainly by regulating the RNA binding protein CELF6
Source: Royal Society of Chemistry journal article supplement (doi:10.1039/d1fo03542h), 2022-01-01
Supplement: d1fo03542h1.pdf [file d1fo03542h1.pdf]

**Supplementary Table 1.** List of primary antibodies used in this study. Dilution ratios given in the third lane are for Western blot. Abbreviations: CST: purchased from the Cell Signalling Technology, Danvers, MA, USA; SCB: Santa Cruz Biotechnology, Santa Cruz, CA, USA.

| Primary antibody  | Obtained from | Cat. No    | Dilution |
|-------------------|---------------|------------|----------|
| CDK2              | abcam         | ab32147    | 1:1000   |
| CELF6             | Proteintech   | 19078-1-AP | 1:1000   |
| Cyclin E1         | EPITMICS      | 1655-1     | 1:1000   |
| CDK4              | EPITMICS      | 3830-1     | 1:1000   |
| CDK6              | EPITMICS      | 3524-1     | 1:50000  |
| p21               | EPITMICS      | 3733-1     | 1:1000   |
| E2F1              | EPITMICS      | S1798      | 1:1000   |
| $\alpha$ -tubulin | SCB           | sc-5286    | 1:1000   |
| p-Rb              | CST           | 9308S      | 1:1000   |
| GAPDH             | abcam         | ab128915   | 1:10000  |
| $\beta$ -actin    | Proteintech   | 66009-1-Ig | 1:1000   |
| Cyclin D1         | CST           | 2978       | 1:1000   |
| cyclinD3          | CST           | 5175       | 1:1000   |

**Supplementary Table 2. Primer sequences and target sequences used in this study**

| <b>Gene</b>        | <b>Sequence or Target Sequence</b> |
|--------------------|------------------------------------|
| CELF6-F            | 5'-TCTTCATCTATCACCTGCCT-3'         |
| CELF6-R            | 5'-AAAAC TAACAAACCCAAAACAC-3'      |
| GAPDH -F           | 5'- ACGACCACTTTGTCAAGCTC-3'        |
| GAPDH -R           | 5'- GTTGCTGTAGCCAAATTCGT-3'        |
| cyclin D1-F        | 5'-GGAATCCTTTGGTGCCAACT-3'         |
| cyclin D1-R        | 5'- CCTTCCGGTGTGAAACATCT-3'        |
| GADD45 $\alpha$ -F | 5'- GAGAGCAGAAGACCGAAAG-3'         |
| GADD45 $\alpha$ -R | 5'- GCAGGATGTTGATGTCGT-3'          |
| CDK6-F             | 5'- CTCACACTGCTCTCCTCTCA-3'        |
| CDK6-R             | 5'- CCCTCGGAATAGATGCCAGG-3'        |
| E2F3-F             | 5'- CTTAGTATCCGGCACACAAAGT-3'      |
| E2F3-R             | 5'- TGCACACTTGTAAC TTTTAGCCA-3'    |

**Supplementary Table 3. Expression levels of the RNA-binding proteins (RBPs) analyzed by RNA-Seq**

| Gene ID         | Gene Symbol | avgFPKM_DMSO | avgFPKM_YPA | log2 Fold Change | FDR         |
|-----------------|-------------|--------------|-------------|------------------|-------------|
| ENSG00000139793 | MBNL2       | 14.4169      | 52.4015     | 1.86185          | 0.000287717 |
| ENSG00000140488 | CELF6       | 0.0443673    | 0.547818    | 3.62613          | 0.00365321  |
| ENSG00000144642 | RBMS3       | 2.8611       | 10.7685     | 1.91217          | 0.000287717 |
| ENSG00000161265 | U2AF1L4     | 6.41664      | 15.9392     | 1.31269          | 0.0114384   |
| ENSG00000132819 | RBM38       | 22.3479      | 10.6518     | -1.06904         | 0.000287717 |
| ENSG00000103067 | ESRP2       | 25.973       | 12.9021     | -1.00941         | 0.00124011  |
| ENSG00000116752 | BCAS2       | 49.0268      | 101.891     | 1.05539          | 0.000287717 |
| ENSG00000131051 | RBM39       | 188.691      | 379.779     | 1.00913          | 0.000287717 |
| ENSG00000076053 | RBM7        | 17.0186      | 47.3817     | 1.47721          | 0.000287717 |
| ENSG00000184863 | RBM33       | 19.6586      | 49.0266     | 1.31841          | 0.000287717 |
| ENSG00000183496 | MEX3B       | 1.37999      | 5.25502     | 1.92904          | 0.000287717 |
| ENSG00000162775 | RBM15       | 7.44664      | 21.0937     | 1.50215          | 0.000287717 |
| ENSG00000100028 | SNRPD3      | 225.173      | 103.266     | -1.12467         | 0.000544733 |
| ENSG00000176624 | MEX3C       | 7.05432      | 18.2007     | 1.36741          | 0.000287717 |
| ENSG00000164548 | TRA2A       | 43.7819      | 119.109     | 1.44388          | 0.000287717 |
| ENSG00000117569 | PTBP2       | 11.2445      | 27.6593     | 1.29855          | 0.000287717 |
| ENSG00000213079 | SCAF8       | 7.89595      | 17.1125     | 1.11586          | 0.000287717 |
| ENSG00000156304 | SCAF4       | 9.4364       | 23.974      | 1.34516          | 0.000287717 |
