# Supplementary material for: The natural compound neobractatin inhibits cell proliferation mainly by regulating the RNA binding protein CELF6
Source: Royal Society of Chemistry journal article supplement (doi:10.1039/d1fo03542h), 2022-01-01
Supplement: d1fo03542h3.pdf [file d1fo03542h3.pdf]

Supplementary Figure 1.

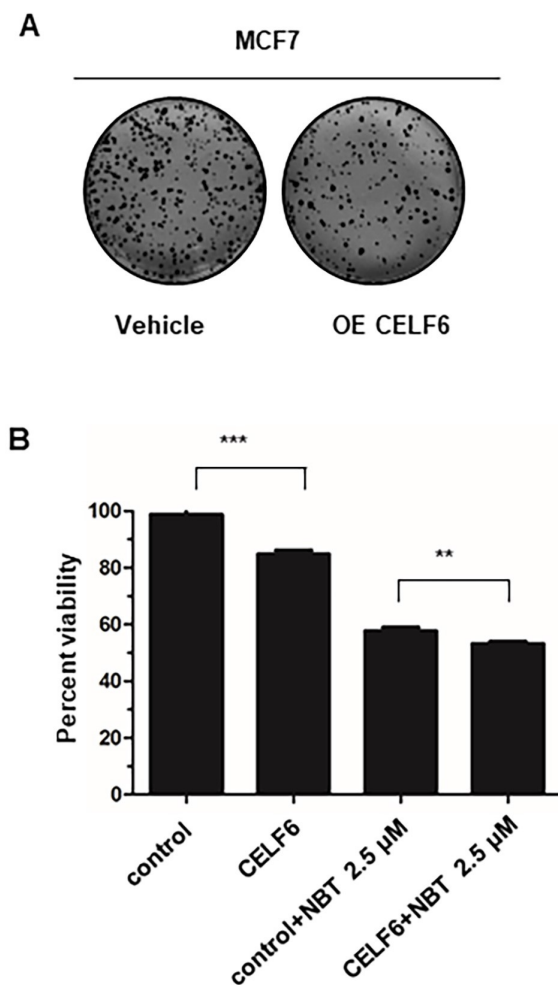

**Supplementary Figure 1. The effect of CELF6 on MCF-7 cell proliferation.**

(A) MCF7-CELF6 and vehicle control cells were subjected to clonogenic cell survival assays for 14 days. (B) The MTT assay was performed to determine the proliferation of MCF-7 cells transfected with the empty vector (control) or CELF6 pcDNA3.1 (+) plasmid and treated with or without NBT (2.5 μM) for 24 h.  $***P < 0.001$  and  $**P < 0.01$  compared with the control group using Student's t test.
