# Supplementary material for: The natural compound neobractatin inhibits cell proliferation mainly by regulating the RNA binding protein CELF6
Source: Royal Society of Chemistry journal article supplement (doi:10.1039/d1fo03542h), 2022-01-01
Supplement: d1fo03542h5.pdf [file d1fo03542h5.pdf]

Supplementary Figure 3.

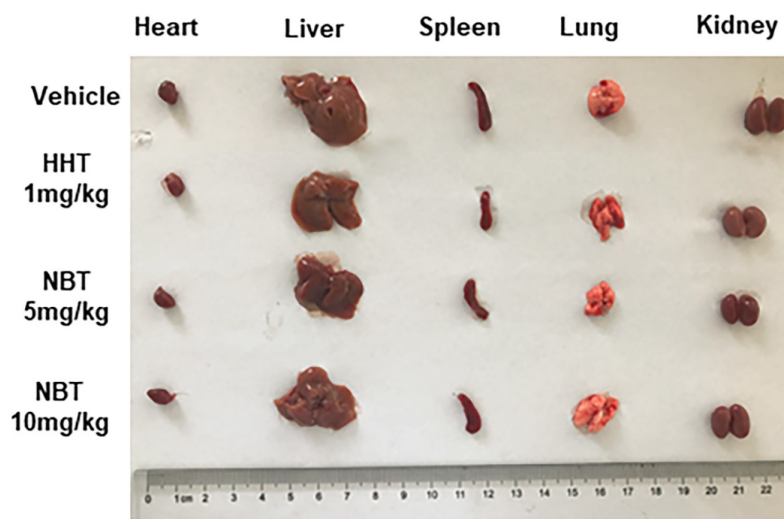

**Supplementary Figure 3. NBT shows low toxicity *in vivo*.**

After treatment of NBT for 14 days, the mice were killed. Images of lung, liver, kidney, heart and spleen from vehicle, HHT (1mg/kg), NBT (5mg/kg) and NBT (10mg/kg) treated nude mice.
