# Supplementary material for: The natural compound neobractatin inhibits cell proliferation mainly by regulating the RNA binding protein CELF6
Source: Royal Society of Chemistry journal article supplement (doi:10.1039/d1fo03542h), 2022-01-01
Supplement: d1fo03542h6.pdf [file d1fo03542h6.pdf]

Supplementary Figure 4.

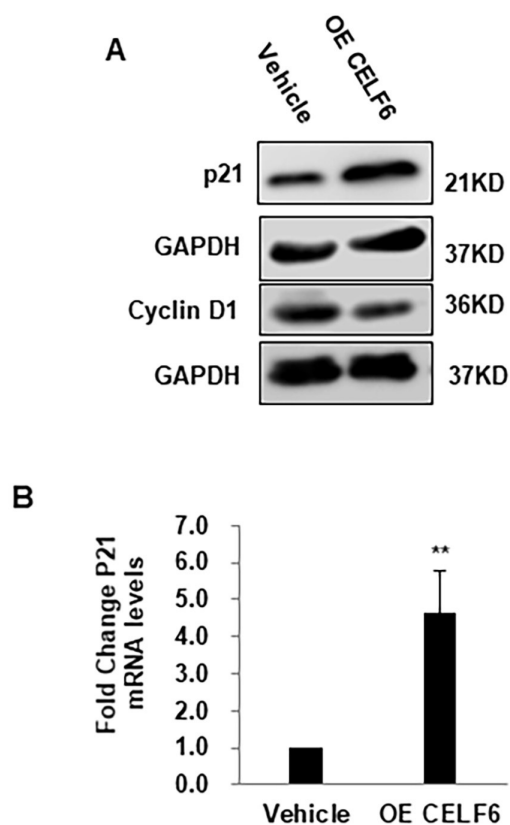

**Supplementary Figure 4. Overexpression of CELF6 increases levels of both the p21 mRNA and protein.**

(A) The level of the p21 protein was determined in HeLa-CELF6 and vehicle control cells using western blotting.

(B) The level of the p21 mRNA was determined in HeLa-CELF6 and vehicle control cells using RT-PCR.
